# Supplementary material for: A chemical precursor for depositing Sb2S3 onto mesoporous TiO2 layers in nonaqueous media and its application to solar cells
Source: Royal Society of Chemistry journal article supplement (doi:10.1039/c2dt31348k), 2012-01-01
Supplement: c2dt31348k.pdf [file c2dt31348k.pdf]

Electronic Supplementary Information

## Chemical precursor for depositing $\text{Sb}_2\text{S}_3$ onto mesoporous $\text{TiO}_2$ layers in nonaqueous media and its application to solar cell

Nilkamal Maiti, Sang Hyuk Im, Choong-Sun Lim, and Sang Il Seok

### Experimental

#### X-ray crystal structure determination

A crystal of dimensions 0.23 X 0.20 X 0.14 mm was mounted on a Bruker Smart Apex-II CCD X-ray diffractometer equipped with a Mo-target X-ray tube ( $\lambda=0.71073 \text{ \AA}$ ) operated at 50 kV, 30 mA. The X-ray intensities were measured at 100(1) K with liquid  $\text{N}_2$  stream and were integrated with the Bruker SAINT software package<sup>1</sup> with a narrow frame algorithm. The integration of the data yielded a total of 17139 reflections to a maximum  $2\theta$  value of  $56.56^\circ$  of which 2956 were independent and 2820 were greater than  $2\sigma(I)$ . The final cell constants (Table 1S) were based on the xyz centroids of 9985 reflections above  $10\sigma(I)$ . The data were processed with SADABS<sup>1</sup> and corrected for absorption. The structure was solved and refined with the Bruker SHELXTL (version 2008) software package,<sup>2</sup> using the space group  $\text{Pbca}$  with  $Z=8$  for the formula  $\text{SbCl}_3\text{C}_4\text{H}_{10}\text{N}_2\text{S}_2$ . All non-hydrogen atoms were refined anisotropically with the hydrogen placed in idealized positions. Full matrix least-squares refinement based on  $F^2$  converged at  $R1 = 0.0142$  and  $wR2=0.0311$  [based on  $I>2\sigma(I)$ ],  $R1=0.0154$  and  $wR2 = 0.0315$  for all data.

#### Device fabrication

An 50-nm-thick dense  $\text{TiO}_2$  blocking layer (bl- $\text{TiO}_2$ ) was deposited on FTO (Fluorine doped  $\text{SnO}_2$ ) glass (TEC8, Pilkington) by the spray pyrolysis deposition (SPD) of 0.02 M titanium diisopropoxide bis(acetylacetonate) solution to prevent direct contact between FTO and P3HT (Poly-3-hexylthiophene) hole transporting material. Then, 1.0  $\mu\text{m}$ -thick mesoscopic  $\text{TiO}_2$  (particle size =  $\sim 50 \text{ nm}$ , anatase phase) layer was screen printed on the bl- $\text{TiO}_2$  and sintered at  $500^\circ\text{C}$  for 1 h. The junction among the nanocrystalline  $\text{TiO}_2$  particles was modified by immersing the mesoscopic  $\text{TiO}_2$  film into a 20 mM of  $\text{TiCl}_4$  aqueous solution for 12 h and sintering at  $500^\circ\text{C}$  for 30 min. The  $\text{Sb}_2\text{S}_3$  sensitizer was deposited by chemical bath deposition (CBD) by dipping the mesoscopic  $\text{TiO}_2$  film into chemical bath of non-aqueous medium at certain condition described in Table 2. The orange-colored amorphous  $\text{Sb}_2\text{S}_3$  film was then annealed at  $300^\circ\text{C}$  in Ar atmosphere for 30 min. The P3HT/1,2 dichlorobenzene solution (15 mg/1 ml) was spin-coated on the  $\text{Sb}_2\text{S}_3$ /mesoscopic  $\text{TiO}_2$  film at 2500 rpm for 60 s, and

annealed at 90 °C in a vacuum oven for 40 min. The Au counter electrode was deposited by thermal evaporation under a pressure of  $5 \times 10^{-6}$  Torr. The active device area was fixed to 16 mm<sup>2</sup>.

### Device characterization

The current density-voltage (J-V) curves were measured at 1 sun illumination (AM 1.5 global, 100 mW/cm<sup>2</sup>) with a solar simulator (Newport, Class A, 91195A), a Keithley 2420 sourcemeter, and a calibrated Si reference cell (certified by NREL). The external quantum efficiency (EQE) spectra were measured by home-designed system using a light source (300 W Xe lamp, Newport, 66902), a monochromator (Newport Cornerstone 260), and a multimeter (Keithley 2002). All measurements were conducted by masking the cells with a 9.6 mm<sup>2</sup> metal mask on active area.

**Table S1.** Crystal data and structure refinement for Sb(III)(TA)<sub>2</sub>Cl<sub>3</sub>.

|                                 |                                                                                                   |
|---------------------------------|---------------------------------------------------------------------------------------------------|
| Identification code             | 20100810lt2_0ma                                                                                   |
| Empirical formula               | C <sub>4</sub> H <sub>10</sub> Cl <sub>3</sub> N <sub>2</sub> S <sub>2</sub> Sb                   |
| Formula weight                  | 378.36                                                                                            |
| Temperature                     | 100(1) K                                                                                          |
| Wavelength                      | 0.71073 Å                                                                                         |
| Crystal system                  | Orthorhombic                                                                                      |
| Space group                     | Pbca                                                                                              |
| Unit cell dimensions            | a = 10.3812(1) Å      □ = 90°.<br>b = 8.3211(1) Å      □ = 90°.<br>c = 27.6752(3) Å      □ = 90°. |
| Volume                          | 2390.67(5) Å <sup>3</sup>                                                                         |
| Z                               | 8                                                                                                 |
| Density (calculated)            | 2.102 Mg/m <sup>3</sup>                                                                           |
| Absorption coefficient          | 3.283 mm <sup>-1</sup>                                                                            |
| F(000)                          | 1456                                                                                              |
| Crystal size                    | 0.23 x 0.20 x 0.14 mm <sup>3</sup>                                                                |
| Theta range for data collection | 1.47 to 28.29°.                                                                                   |
| Index ranges                    | -10 ≤ h ≤ 13, -11 ≤ k ≤ 9, -34 ≤ l ≤ 36                                                           |
| Reflections collected           | 17139                                                                                             |
| Independent reflections         | 2956 [R(int) = 0.0185]                                                                            |
| Completeness to theta = 28.29°  | 99.7 %                                                                                            |
| Absorption correction           | Multi-scan                                                                                        |

|                                   |                                             |
|-----------------------------------|---------------------------------------------|
| Max. and min. transmission        | 0.6565 and 0.5190                           |
| Refinement method                 | Full-matrix least-squares on F <sup>2</sup> |
| Data / restraints / parameters    | 2956 / 0 / 110                              |
| Goodness-of-fit on F <sup>2</sup> | 1.121                                       |
| Final R indices [I>2sigma(I)]     | R1 = 0.0142, wR2 = 0.0311                   |
| R indices (all data)              | R1 = 0.0154, wR2 = 0.0315                   |
| Extinction coefficient            | 0.00091(5)                                  |
| Largest diff. peak and hole       | 0.481 and -0.293 e.Å <sup>-3</sup>          |

**Table S2.** Atomic coordinates ( $\times 10^4$ ) and equivalent isotropic displacement parameters ( $\text{\AA}^2 \times 10^3$ ) for Sb(III)(TA)<sub>2</sub>Cl<sub>3</sub>. U(eq) is defined as one third of the trace of the orthogonalized U<sup>ij</sup> tensor.

|       | x       | y        | z        | U(eq) |
|-------|---------|----------|----------|-------|
| Sb    | 4280(1) | 8190(1)  | 8680(1)  | 11(1) |
| Cl(1) | 5298(1) | 10712(1) | 8871(1)  | 15(1) |
| Cl(2) | 6393(1) | 6849(1)  | 8701(1)  | 16(1) |
| Cl(3) | 3304(1) | 4639(1)  | 8694(1)  | 17(1) |
| S(1)  | 4366(1) | 7969(1)  | 9670(1)  | 17(1) |
| C(1)  | 3022(1) | 6943(2)  | 9840(1)  | 14(1) |
| C(2)  | 3066(2) | 5963(2)  | 10292(1) | 21(1) |
| N(1)  | 1960(1) | 7006(2)  | 9596(1)  | 19(1) |
| S(11) | 4840(1) | 9251(1)  | 7775(1)  | 16(1) |
| C(11) | 3801(1) | 8247(2)  | 7408(1)  | 14(1) |
| C(12) | 2750(1) | 7202(2)  | 7599(1)  | 16(1) |
| N(11) | 3899(1) | 8401(2)  | 6941(1)  | 20(1) |

**Table S3.** Bond lengths [Å] and angles [°] for Sb(III)(TA)<sub>2</sub>Cl<sub>3</sub>.

---

|                  |             |
|------------------|-------------|
| Sb-Cl(1)         | 2.4086(4)   |
| Sb-Cl(2)         | 2.4618(4)   |
| Sb-S(11)         | 2.7206(4)   |
| Sb-S(1)          | 2.7474(4)   |
| S(1)-C(1)        | 1.7025(15)  |
| C(1)-N(1)        | 1.2954(19)  |
| C(1)-C(2)        | 1.493(2)    |
| C(2)-H(2A)       | 0.9600      |
| C(2)-H(2B)       | 0.9600      |
| C(2)-H(2C)       | 0.9600      |
| N(1)-H(1A)       | 0.8600      |
| N(1)-H(1B)       | 0.8600      |
| S(11)-C(11)      | 1.7005(15)  |
| C(11)-N(11)      | 1.3011(19)  |
| C(11)-C(12)      | 1.493(2)    |
| C(12)-H(12A)     | 0.9600      |
| C(12)-H(12B)     | 0.9600      |
| C(12)-H(12C)     | 0.9600      |
| N(11)-H(11A)     | 0.8600      |
| N(11)-H(11B)     | 0.8600      |
| Cl(1)-Sb-Cl(2)   | 89.930(13)  |
| Cl(1)-Sb-S(11)   | 79.963(12)  |
| Cl(2)-Sb-S(11)   | 88.732(12)  |
| Cl(1)-Sb-S(1)    | 79.917(12)  |
| Cl(2)-Sb-S(1)    | 85.284(12)  |
| S(11)-Sb-S(1)    | 158.998(12) |
| C(1)-S(1)-Sb     | 106.41(5)   |
| N(1)-C(1)-C(2)   | 119.08(13)  |
| N(1)-C(1)-S(1)   | 122.19(12)  |
| C(2)-C(1)-S(1)   | 118.72(11)  |
| C(1)-C(2)-H(2A)  | 109.5       |
| C(1)-C(2)-H(2B)  | 109.5       |
| H(2A)-C(2)-H(2B) | 109.5       |

|                     |            |
|---------------------|------------|
| C(1)-C(2)-H(2C)     | 109.5      |
| H(2A)-C(2)-H(2C)    | 109.5      |
| H(2B)-C(2)-H(2C)    | 109.5      |
| C(1)-N(1)-H(1A)     | 120.0      |
| C(1)-N(1)-H(1B)     | 120.0      |
| H(1A)-N(1)-H(1B)    | 120.0      |
| C(11)-S(11)-Sb      | 104.81(5)  |
| N(11)-C(11)-C(12)   | 117.81(14) |
| N(11)-C(11)-S(11)   | 119.68(12) |
| C(12)-C(11)-S(11)   | 122.50(11) |
| C(11)-C(12)-H(12A)  | 109.5      |
| C(11)-C(12)-H(12B)  | 109.5      |
| H(12A)-C(12)-H(12B) | 109.5      |
| C(11)-C(12)-H(12C)  | 109.5      |
| H(12A)-C(12)-H(12C) | 109.5      |
| H(12B)-C(12)-H(12C) | 109.5      |
| C(11)-N(11)-H(11A)  | 120.0      |
| C(11)-N(11)-H(11B)  | 120.0      |
| H(11A)-N(11)-H(11B) | 120.0      |

---

Symmetry transformations used to generate equivalent atoms:

### References

1. Bruker, (2005), APEX 2, SAINT and SADABS. Bruker AXS Inc., Madison, Wisconsin, USA.
2. G. M. Sheldrick, *Acta Cryst.* 2008, **A64**, 112-122.
